# Supplementary material for: Deubiquitinase USP28 inhibits ubiquitin ligase KLHL2-mediated uridine-cytidine kinase 1 degradation and confers sensitivity to 5'-azacytidine-resistant human leukemia cells
Source: PubMed Central journal article supplement (PMC6956814; doi:10.7150/thno.36503), 2020-01-01
Supplement: thnov10p1046s1.pdf [file thnov10p1046s1.pdf]

**Deubiquitinase USP28 inhibits ubiquitin ligase KLHL2-mediated uridine-cytidine kinase 1 degradation and confers sensitivity to 5'-azacytidine-resistant human leukemia cells**

Heng Zhang<sup>1</sup>, He Huang<sup>1, \*</sup>, Xing Feng<sup>2</sup>, Huiwen Song<sup>3</sup>, Zhiyong Zhang<sup>4, \*</sup>, Aizong Shen<sup>5, \*</sup>, Xingfeng Qiu<sup>6, \*</sup>

**Supplementary information**

**Table S1**

**Primers for qRT-PCR**

| <b>Gene</b>    | <b>Sense primer</b>      | <b>Antisense primer</b>  |
|----------------|--------------------------|--------------------------|
| USP28          | GGAACAGCAGCAAGATGTGA     | GGCCGAAGGTCTCATTGTTA     |
| CDK4           | ATGGCTGCCACTCGATATGAACCC | GTACCAGAGCGTAACCACCACAGG |
| CDK6           | TGGAGACCTTCGAGCACC       | CACTCCAGGCTCTGGAACCT     |
| RB             | GGACATGTGAAC TTATATA     | GAACGATTATCCATT CAAA     |
| E2F1           | GCCACTGACTCTGCCACCATAG   | CTGCCATCCGGGACAAC        |
| cyclin D1      | AAGGCGGAGGAGACCTGCGCG    | ATCGTGCGGCATTGCGGC       |
| $\beta$ -actin | AGCCATGTACGTTGCTAT       | GATGTCCACGTCACACTTCA     |
| KLHL2          | TTCTTAACCTCGGCATC        | AACTCCTGTCTTACGTCCTT     |
| p27            | AATAAGGAAGCGACCTGCAA     | CCTCCCTTCCCCAAAGTTTA     |
| p15            | CGTTAAGTTTACGGCCAACG     | GGTGAGAGTGGCAGGGTCT      |
| GAPDH          | GCCAAGGTCATCCATGACAAC    | GTCCACCACCCTGTTGCTGTA    |

**Table S2****Identification of UCK1-interacting proteins via mass spectrometry**

| <b>Swiss-Prot accession no.</b> | <b>Gene Symbol</b> | <b>protein name</b>                                           | <b>No. of unique peptides matched</b> | <b>% sequence identified by ms/ms data</b> | <b>Protein mascot score</b> |
|---------------------------------|--------------------|---------------------------------------------------------------|---------------------------------------|--------------------------------------------|-----------------------------|
| P00558                          | PGK1               | Phosphoglycerate Kinase 1                                     | 7                                     | 23%                                        | 195                         |
| Q9HA47                          | UCK1               | Uridine-Cytidine Kinase 1                                     | 8                                     | 25%                                        | 182                         |
| O95198                          | KLHL2              | Kelch Like Family Member 2                                    | 4                                     | 18%                                        | 154                         |
| Q9BZX2                          | UCK2               | Uridine-Cytidine Kinase 2                                     | 6                                     | 20%                                        | 128                         |
| Q9BZM1                          | PLA2G12A           | Phospholipase A2 Group XIIA                                   | 7                                     | 17%                                        | 120                         |
| Q96RU2                          | USP28              | Ubiquitin Specific Peptidase 28                               | 6                                     | 13%                                        | 107                         |
| Q5T6WS                          | HNRNPK             | Heterogeneous Nuclear Ribonucleoprotein K                     | 5                                     | 15%                                        | 106                         |
| Q13315                          | ATM                | Ataxia Telangiectasia Mutated                                 | 4                                     | 13%                                        | 82                          |
| K1UQX6                          | HSP90              | Heat shock protein 90                                         | 7                                     | 17%                                        | 63                          |
| O14744                          | PRMT5              | Protein Arginine N-Methyltransferase 5                        | 6                                     | 16%                                        | 42                          |
| Q6NYC1                          | JMJD6              | Bifunctional Arginine Demethylase And Lysyl-Hydroxylase JMJD6 | 8                                     | 10%                                        | 38                          |

### Figure S1

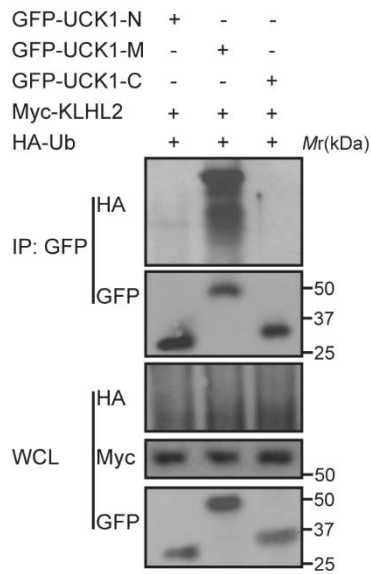

**Figure S1. Overexpression of KLHL2 had no effect on the ubiquitination level of N or C terminal region of UCK1.** Immunoblotting assay of lysates from HEK293T cells transfected with plasmids for GFP-UCK1-N (N-terminal 1-22 aa), GFP-UCK1-C (C-terminal 221-277 aa), GFP-UCK1-M (middle domain 23-220 aa), HA-ubiquitin and Myc-KLHL2, followed by immunoprecipitation with anti-GFP, and analyzed via Immunoblotting with anti-HA antibody. Cells were treated with MG132 before harvest.

### Figure S2

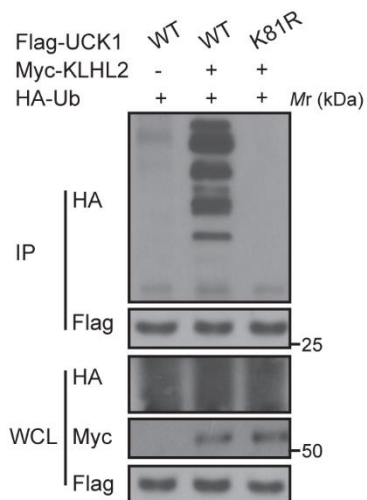

**Figure S2. KLHL2 does not degrade UCK1 K81R mutant.** Immunoprecipitation and immunoblotting assays of the indicated proteins in HEK293T cells transfected with KLHL2 and K48-linked ubiquitin together with various UCK1 WT or K81R mutant as shown.

**Figure S3**

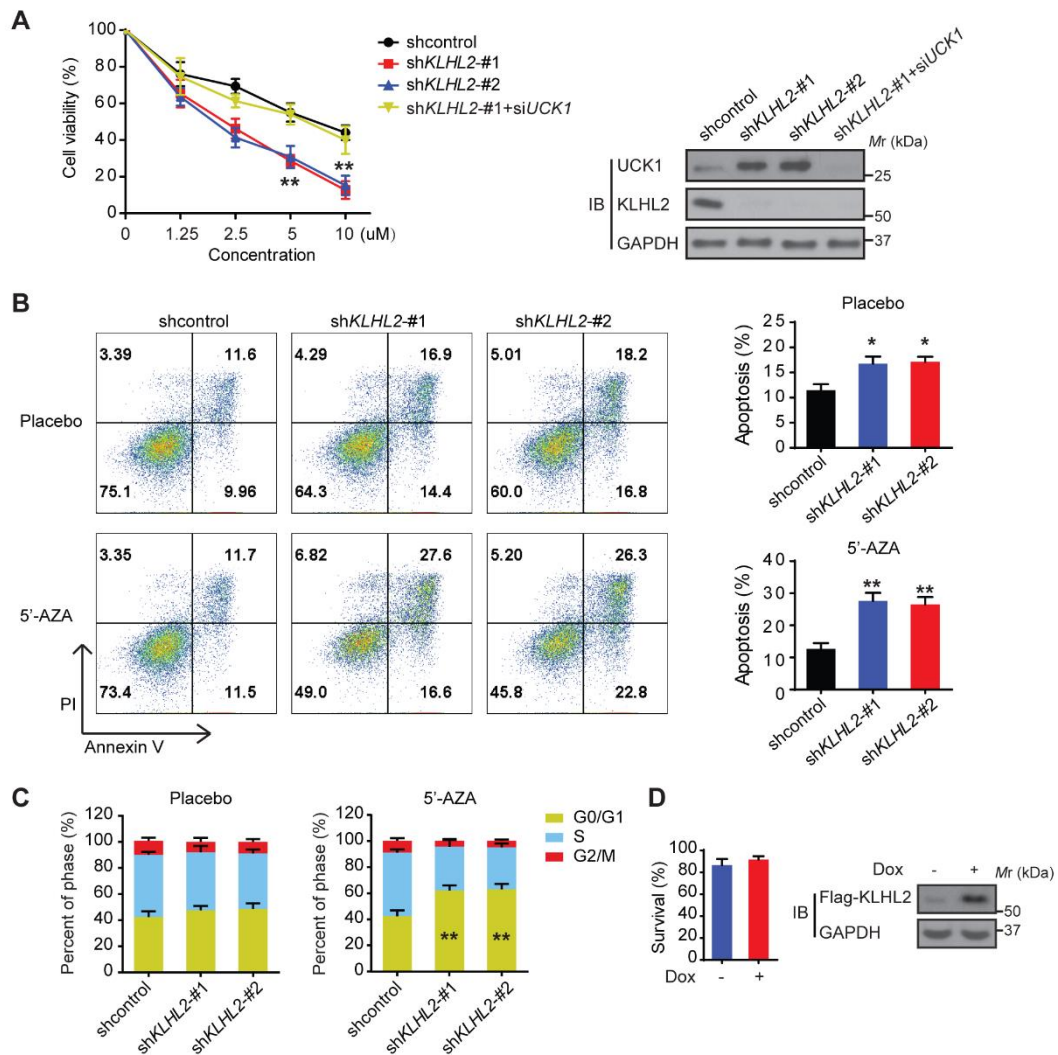

**Figure S3. Knockdown of KLHL2 significantly sensitizes 5'-AZA to inhibit AML cells.** R-HL-60 cells transfected with *KLHL2* shRNA and shcontrol were treated with or without 5'-AZA for 48 h. (A) CCK8 assays were carried out to examine the proliferation of R-HL-60 cells in the presence of different concentrations of 5'-AZA (left panel). The protein levels of UCK1 and KLHL2 were determined (right panel) (B) FACS analysis of the apoptosis of R-HL-60 cells under 2.5 uM 5'-AZA. Representative images of cellular apoptosis were shown (left panel). And the percentage of apoptosis cells with indicated treatment was presented in the bar charts (right panel). (C) The percentage of cells with indicated treatment in the different phases of the cell cycle was shown in the bar charts. (D) MV4-11 cells were transfected with a doxycycline-inducible lentiviral vector to upregulating Flag-KLHL2. Then cell survival was determined using Annexin V staining (left panel). Cell lysates were analyzed by Western blots using anti-Flag antibody to confirm doxycycline-

inducible expression (right panel). \* $P < .05$ ; \*\* $P < .01$ , and \*\*\* $P < .001$ .

**Figure S4**

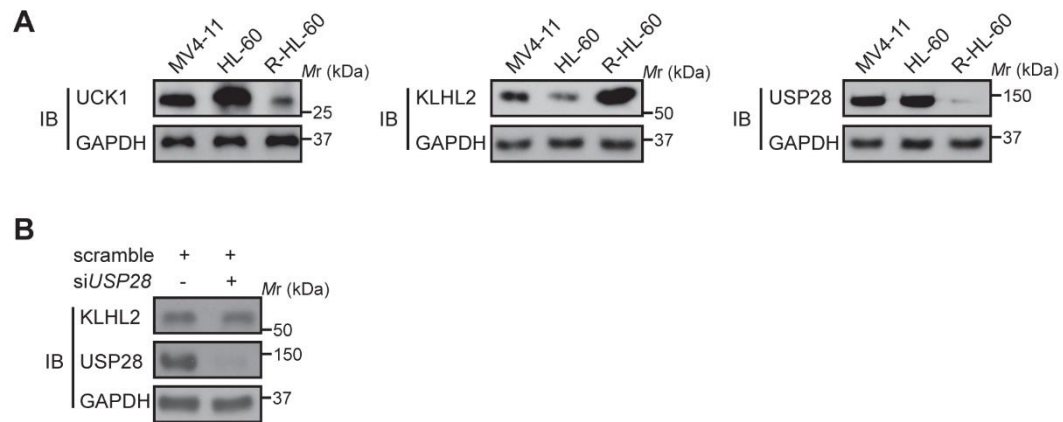

**Figure S4.** (A) The expression level of UCK1, KLHL2 and USP28 in MV4-11 and HL-60 cells. (B) USP28 knockdown didn't change the protein level of KLHL2. MV4-11 cells were transfected with or without USP28 siRNA, then immunoblotting was detected with indicated antibodies.

**Figure S5**

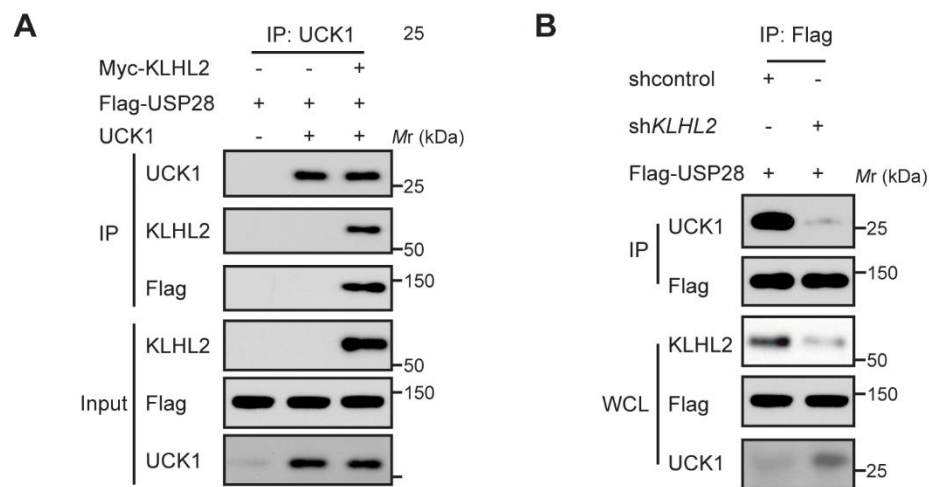

**Figure S5. USP28 binds to UCK1 via KLHL2.** (A) KLHL2 enhances binding of USP28 to UCK1. HEK293T cells were cotransfected with Flag-tagged USP28, UCK1, and Myc-KLHL2. 2 days later, cells were treated with the proteasome inhibitor MG132 for three hours and subjected to immunoprecipitation and immunoblotting analysis. (B) Silencing *KLHL2* decreases binding of USP28 to UCK1. HEK293T cells were cotransfected with Flag-USP28 and either shcontrol or *KLHL2* shRNA-#1. After transfection, cells were lysed and immunoprecipitated with an anti-Flag antibody. Immunoblotting was performed with antibodies as indicated.

**Figure S6**

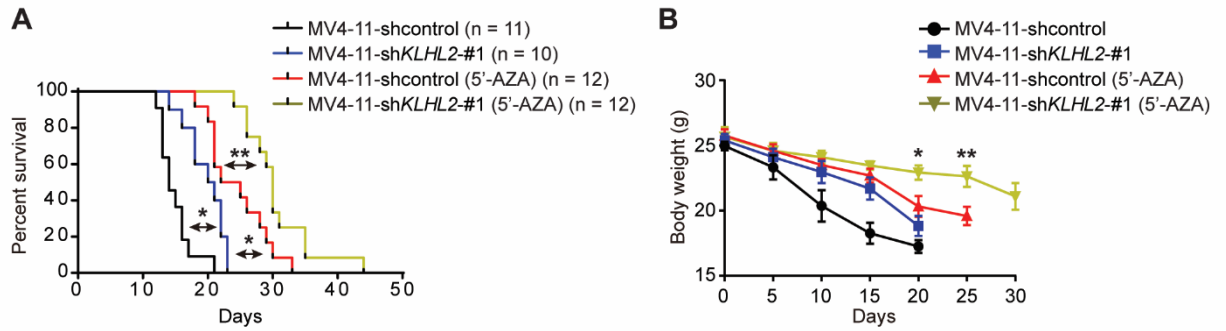

**Figure S6. KLHL2 knockdown significantly sensitized 5'-AZA to inhibit MV4-11 cells *in vivo*.**

MV4-11 were divided into MV4-11-shcontrol and MV4-11-shKLHL2-#1. (A) Kaplan-Meier survival curves for recipients of MV4-11 cells with or without KLHL2 knockdown. (E) Body weight for AML mice with indicated treatment. Results were expressed as mean  $\pm$  SEM of at least 10 mice in each group. \* $P < .05$ ; \*\* $P < .01$
